# Supplementary material for: The Hitchhiker’s Guide to Untargeted Lipidomics Analysis: Practical Guidelines
Source: MDPI journal article supplement (doi:10.3390/metabo11110713), 2021-10-20
Supplement: s1 [file s1]

**Table S1.****A non-comprehensive list of tools suitable for the analysis of LC-MS data.**

| Tool                      | Implementation                   | Last update      | Description                                                                                                                                                                                                            |
|---------------------------|----------------------------------|------------------|------------------------------------------------------------------------------------------------------------------------------------------------------------------------------------------------------------------------|
| XCMS                      | Web, R                           | 2021 (R version) | Performs all preprocessing steps for untargeted LC-MS data from data input to statistical testing and visualization.                                                                                                   |
| LipidFinder               | WEB, Python                      | 2021             | Identifies lipid features from pre-aligned data using information from LIPID MAPS (COMP_DB and LMSD databases). Additionally performs statistical analysis on identified lipids. Part of the LIPID MAPS web interface. |
| MZmine 2                  | Java                             | 2019             | Provides modules for raw data filtering, peak calling, peak processing and downstream analysis. Along with XCMS, MZmine 2 is the most widely used program for LC-MS data analysis.                                     |
| MetaboAnalyst 5.0         | Web, R                           | 2021             | Incorporates a large number of functions for downstream analysis, including statistical testing methods, enrichment and pathway analyses. Requires XCMS functionality for raw LC-MS spectra processing.                |
| Galaxy-M                  | R, Python, MATLAB                | 2016             | A pipeline for LC-MS metabolomics working in the Galaxy environment.                                                                                                                                                   |
| LipidXplorer              | Windows executable               | 2019             | Implements functionality for peaks alignment and subsequent lipid identification based on Molecular Fragmentation Query Language (MFQL) approach.                                                                      |
| OpenMS                    | Linux, Windows, macOS executable | 2021             | “All-in-one” solution for the lipidomics data analysis. Includes <i>ThermoRawFileParser</i> data conversion.                                                                                                           |
| Lipid Data Analyzer (LDA) | Java                             | 2021             | A tool for lipid species interpretation. It is also able to detect novel features.                                                                                                                                     |
| LipidHunter 2             | Python                           | 2020             | Identifies phospholipids, glycerolipids, and lysophospholipids. Supports multiple instrument vendors.                                                                                                                  |

|                                 |                                  |      |                                                                                                                                                                                                             |
|---------------------------------|----------------------------------|------|-------------------------------------------------------------------------------------------------------------------------------------------------------------------------------------------------------------|
| MetAlign 3                      | Windows executable               | 2018 | Provides a large number of functions for MS data preprocessing (e.g., for baseline correction, peak picking, annotation)                                                                                    |
| LipidMatch                      | R                                | 2020 | Performs rule-based lipid identification within LC-HRMS/MS data.                                                                                                                                            |
| LipidMS                         | R                                | 2021 | An R package developed for lipid annotation in LC-DIA-MS data.                                                                                                                                              |
| LipidSearch (Thermo Scientific) | -                                | -    | A commercial software suitable for raw LC-MS data processing and lipid identification using an internal library of ion masses.                                                                              |
| MSClust                         | Windows executable               | 2012 | Reduces the number of redundant peaks using the subtractive fuzzy clustering approach.                                                                                                                      |
| LipidBlast                      | -                                | 2014 | Provides a comprehensive database for peak annotation.                                                                                                                                                      |
| MS-DIAL 4                       | Linux, Windows, macOS executable | 2020 | Provides a graphical interface for peak identification within untargeted metabolomics data. Also holds modules for normalization and multivariate analysis. Supports multiple instruments, including LC-MS. |
| LIQUID                          | Windows executable, C# .Net      | 2021 | Similar to MS-DIAL, it allows peak identification through a graphical interface, but is focused on lipids in LS-MS/MS data.                                                                                 |
| lipidr                          | R                                | 2021 | Provides a set of functions for downstream analysis of LC-MS lipidomics data.                                                                                                                               |
| lipyd                           | Python                           | 2020 | Provides workflow for lipidomics data analysis. Requires OpenMS for the data preprocessing step.                                                                                                            |
| LipiDex                         | Java                             | 2018 | Allows gaussian peak modeling based lipid identification and result filtering.                                                                                                                              |
| LION                            | Web                              | 2020 | Provides functionality for the enrichment analysis of lipids using a GO database containing information about lipid classification, subcellular localization, and biophysical properties.                   |

|             |                         |      |                                                                                                                                 |
|-------------|-------------------------|------|---------------------------------------------------------------------------------------------------------------------------------|
| LICRE 1.0   | MATLAB                  | 2017 | Reduces the number of redundant features in lipidomic data by identification and pruning of groups of highly correlated lipids. |
| LipidSig    | Web                     | 2021 | Implements a web-based workflow for downstream analysis of lipidomics data.                                                     |
| LipidLynxX  | Windows executable, Web | 2020 | Provides resources for lipid annotation and ID conversion. Part of the LIPID MAPS web interface.                                |
| LPPTiger    | Windows executable      | 2017 | Performs detection of oxidized phospholipids.                                                                                   |
| Cytoscape 3 | Cross-platform          | 2021 | Allows network analysis and visualization of omics datasets, including lipidomics profiles.                                     |
| LIPEA       | Web                     | 2018 | Performs Over Representation analysis of lipid features using KEGG pathways.                                                    |
